# Supplementary material for: Development and Differentiation of Midbrain Dopaminergic Neuron: From Bench to Bedside
Source: PubMed Central journal article supplement (PMC7349799; doi:10.3390/cells9061489), 2020-06-18
Supplement: cells-09-01489-s001.pdf [file cells-09-01489-s001.pdf]

Table 1: Summary of *in vivo* transplantation studies using iPSC-derived mDA neuron.

| Authors             | Transplanted Cells                 | Animal model                           | Cell dose/<br>injection site                                                | Immuno-<br>suppression | <i>In vivo</i> observation                                      |                                                                                          |                                                    |                                                         |
|---------------------|------------------------------------|----------------------------------------|-----------------------------------------------------------------------------|------------------------|-----------------------------------------------------------------|------------------------------------------------------------------------------------------|----------------------------------------------------|---------------------------------------------------------|
|                     |                                    |                                        |                                                                             |                        | Graft innervation                                               | Behavioral<br>improvement                                                                | Graft size                                         | Graft TH <sup>+</sup> cells                             |
| Kriks et al. 2011   | Nurr1+ progenitors (d25)           | 6-OHDA-lesioned mice (immunodeficient) | 150,000/striatum                                                            | -                      | -                                                               | Amphetamine-induced rotation                                                             | -                                                  | -                                                       |
|                     |                                    | 6-OHDA-lesioned rat                    | 250,000/striatum                                                            | Cyclosporine A         | Striatum                                                        | Amphetamine induced rotation; cylinder test, stepping test                               | -                                                  | 15,000 TH <sup>+</sup> cells                            |
|                     |                                    | 6-OHDA-lesioned monkey                 | 1,250,000/injection ;3 sites/striatum (caudate and pre-commissural putamen) | Cyclosporine A         | -                                                               | TH fibers extend >3 mm into the host                                                     | -                                                  | -                                                       |
| Kirkeby et al.2012  | FoxA2/Lmx1a 80% (d10, d16)         | 6-OHDA-lesioned rat                    | 150,000-300,000/striatum                                                    | Cyclosporine A         | Striatum, Amygdala and Snr                                      | amphetamine induced rotation; cylinder test,                                             | 15-20 mm <sup>3</sup>                              | -                                                       |
| Dio et al. 2014     | Day 12 sorted CORIN+ cells (d28)   | 6-OHDA-lesioned rat                    | 400,000/striatum (putamen)                                                  | -                      | Striatum                                                        | amphetamine-induced rotation                                                             | 3.4 ± 2.9 mm <sup>3</sup>                          | 6,747 ± 2,341 TH <sup>+</sup> cells                     |
| Chen et al. 2016    | EN1+/OTX2+, LMX1A+/FOX A2+ (day18) | 6-OHDA-lesioned mice (SCID)            | 200,000/striatum                                                            | -                      | Caudate-Putamen, Nucleus Accumbens (Nac) And Olfactory Tubercle | Amphetamine-induced rotation; cylinder test, rotarod test, and spontaneous rotation test | -                                                  | 6110 ± 254 -7555 ± 913 TH <sup>+</sup> cells            |
| Kikuchi et al. 2017 | day 12 sorted CORIN+ cells (d28)   | MPTP monkey                            | 4,800,000/striatum (putamen)                                                | FK506                  | Caudate Nuclei, Putamen, And Whole Striatum                     | Neurological scores                                                                      | 39.4 ± 21.2 mm <sup>3</sup>                        | 64,000 ± 49,000 TH <sup>+</sup> cells                   |
| Kirkeby et al.2017  | FOXA2+/LMX1 A/B+ (day 16, 90.4%)   | 6-OHDA-lesioned rat (athymic)          | 50,000-100,000/striatum                                                     | -                      | Dorsolateral Striatum And Prefrontal Cortex                     | Amphetamine induced rotation; cylinder test,                                             | 0.37 ± 0.07 mm <sup>3</sup> /100,000 cells grafted | 3,716 ± 1,026 TH <sup>+</sup> per 100,000 cells grafted |
